# Supplementary material for: Prediction of bacterial type IV secreted effectors by C-terminal features
Source: PubMed Central journal article supplement (PMC3915618; doi:10.1186/1471-2164-15-50), 2014-01-21

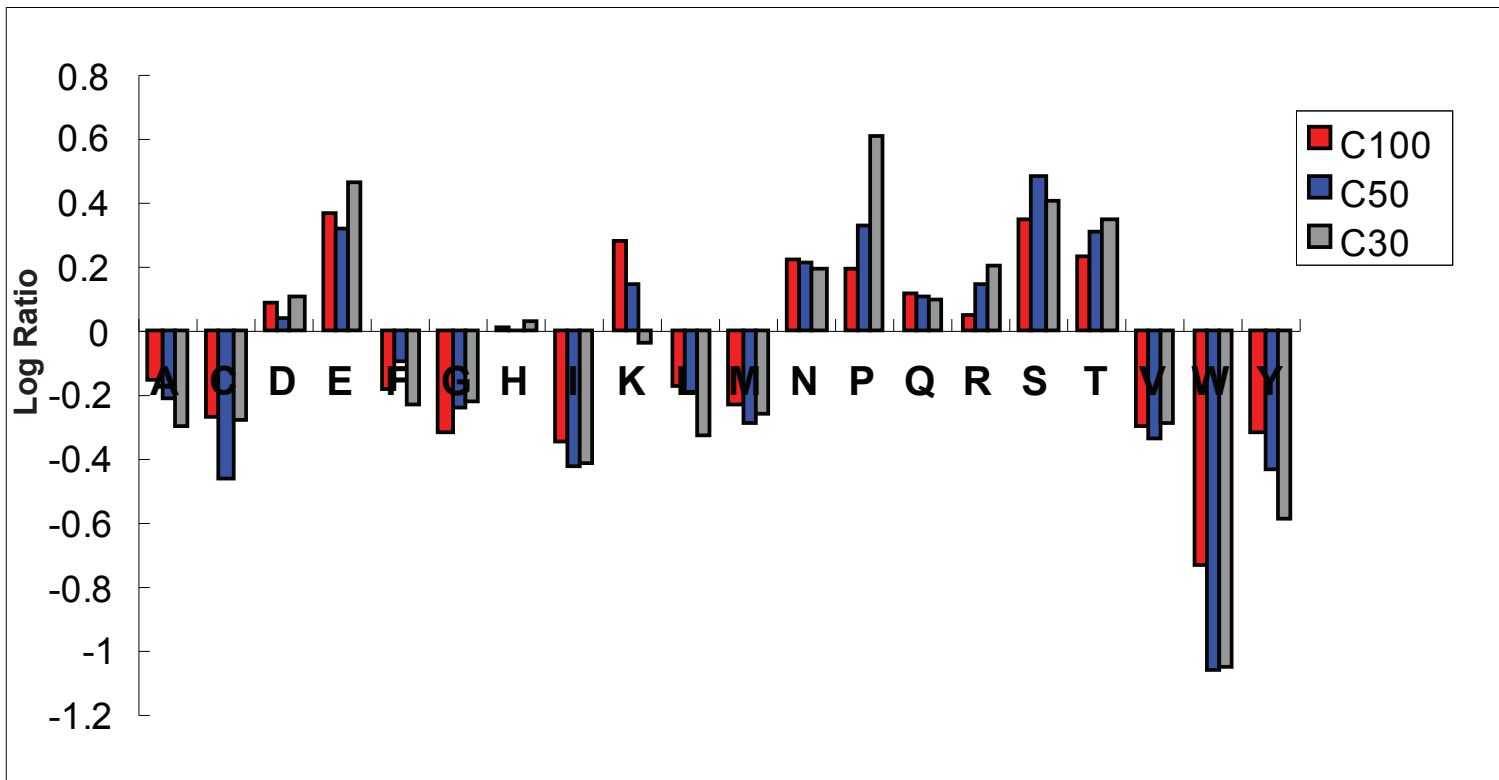

Supplement: 1471-2164-15-50-S1.pdf [file 1471-2164-15-50-S1.pdf]
